# Supplementary material
Source: MDPI journal article supplement (https://www.mdpi.com/2220-9964/12/4/155)
Supplement: s1 [file s1]

**Table S1. Accuracy Evaluation of Land Surface temperature Reconstruction in China from 2010 to 2020**

| Year | MAE   | RMSE  | Pearson |
|------|-------|-------|---------|
| 2010 | 2.920 | 3.723 | 0.916   |
| 2011 | 2.885 | 3.677 | 0.918   |
| 2012 | 2.959 | 3.747 | 0.920   |
| 2013 | 2.771 | 3.515 | 0.925   |
| 2014 | 2.793 | 3.548 | 0.924   |
| 2015 | 2.837 | 3.613 | 0.918   |
| 2016 | 2.898 | 3.711 | 0.913   |
| 2017 | 2.785 | 3.553 | 0.915   |
| 2018 | 2.874 | 3.654 | 0.910   |
| 2019 | 2.829 | 3.603 | 0.920   |
| 2020 | 2.975 | 3.776 | 0.913   |

**Table S2. Indicators related to respiratory diseases**

| Indicators      | Indicator direction | Turning point | Change trend less than the turning point | Change trend larger than the turning point |
|-----------------|---------------------|---------------|------------------------------------------|--------------------------------------------|
| WLST_1th        | +                   |               |                                          |                                            |
| WLST_75th       | +                   |               |                                          |                                            |
| WPM10_YM        | +                   |               |                                          |                                            |
| AQI             | +                   |               |                                          |                                            |
| WRH             | bi                  | 59.86         | —*                                       | ↑                                          |
| WWS10m          | -                   |               |                                          |                                            |
| Age_0_4         | bi                  | 5.717         | ↑                                        | ↓                                          |
| Age_15_19       | -                   |               |                                          |                                            |
| Age_20_39       | bi                  | 30.647        | ↓                                        | ↑                                          |
| Age_60_79       | bi                  | 13.918        | ↓                                        | ↑                                          |
| Age_80          | +                   |               |                                          |                                            |
| PriInd_Ratio    | bi                  | 18.259        | —                                        | ↑                                          |
| SecInd_Ratio    | +                   |               |                                          |                                            |
| TerInd_Ratio    | bi                  | 25.103        | ↑                                        | ↓                                          |
| Unemp_Rate      | +                   |               |                                          |                                            |
| Res_Ratio       | +                   |               |                                          |                                            |
| Oil             | +                   |               |                                          |                                            |
| Meat            | bi                  | 21.2          | →                                        | ↑                                          |
| Fruit           | -                   |               |                                          |                                            |
| Sugar           | +                   |               |                                          |                                            |
| Uni_PTP         | -                   |               |                                          |                                            |
| Green_Ratio     | -                   |               |                                          |                                            |
| FreshFood_Ratio | -                   |               |                                          |                                            |

\* indicates that the indicator has no significant correlation with the corresponding chronic disease mortality within this interval ( $p > 0.05$ ), and the following tables are the same.

**Table S3. Indicators related to heart diseases**

| <b>Indicators</b> | <b>Indicator direction</b> | <b>Turning point</b> | <b>Change trend less than the turning point</b> | <b>Change trend larger than the turning point</b> |
|-------------------|----------------------------|----------------------|-------------------------------------------------|---------------------------------------------------|
| WTSD              | +                          |                      |                                                 |                                                   |
| WDTD_90th         | +                          |                      |                                                 |                                                   |
| NO2_YM            | +                          |                      |                                                 |                                                   |
| CO_YM             | +                          |                      |                                                 |                                                   |
| O3_YM             | +                          |                      |                                                 |                                                   |
| AQI               | +                          |                      |                                                 |                                                   |
| Age_0_4           | bi                         | 5.074                | ↓                                               | ↑                                                 |
| Age_15_19         | -                          |                      |                                                 |                                                   |
| Age_40_59         | +                          |                      |                                                 |                                                   |
| Age_60_79         | bi                         | 13.932               | ↑                                               | ↓                                                 |
| PriInd_Ratio      | -                          |                      |                                                 |                                                   |
| AquaProducts      | bi                         | 16.126               | ↑                                               | ↓                                                 |
| Egg               | +                          |                      |                                                 |                                                   |
| Uni_PTP           | -                          |                      |                                                 |                                                   |
| High_PTP          | -                          |                      |                                                 |                                                   |
| School_PTP        | -                          |                      |                                                 |                                                   |

**Table S4. Indicators related to cerebrovascular diseases**

| <b>Indicators</b> | <b>Indicator direction</b> | <b>Turning point</b> | <b>Change trend less than the turning point</b> | <b>Change trend larger than the turning point</b> |
|-------------------|----------------------------|----------------------|-------------------------------------------------|---------------------------------------------------|
| WIITV_90th        | bi                         | 6.252                | ↑                                               | ↓                                                 |
| WPM25_IT3         | +                          |                      |                                                 |                                                   |
| NO2_YM            | +                          |                      |                                                 |                                                   |
| O3_YM             | +                          |                      |                                                 |                                                   |
| WSP               | bi                         | 85972.3              | ↓                                               | ↑                                                 |
| Age_5_14          | -                          |                      |                                                 |                                                   |
| Age_15_19         | -                          |                      |                                                 |                                                   |
| Age_40_59         | +                          |                      |                                                 |                                                   |
| Age_60_79         | +                          |                      |                                                 |                                                   |
| MF_Ratio          | bi                         | 1.062                | ↓                                               | ↑                                                 |
| SecInd_Ratio      | +                          |                      |                                                 |                                                   |
| Ind_Ratio         | +                          |                      |                                                 |                                                   |
| AquaProducts      | bi                         | 16.113               | ↑                                               | ↓                                                 |
| Egg               | +                          |                      |                                                 |                                                   |
| High_PTP          | -                          |                      |                                                 |                                                   |
| School_PTP        | -                          |                      |                                                 |                                                   |
| Attractions_Ratio | -                          |                      |                                                 |                                                   |

**Table S5. Indicators related to malignant tumors**

| <b>Indicators</b> | <b>Indicator direction</b> | <b>Turning point</b> | <b>Change trend less than the turning point</b> | <b>Change trend larger than the turning point</b> |
|-------------------|----------------------------|----------------------|-------------------------------------------------|---------------------------------------------------|
| WLST_75th         | +                          |                      |                                                 |                                                   |
| WDTD_50th         | +                          |                      |                                                 |                                                   |
| WPM25_IT3         | +                          |                      |                                                 |                                                   |
| NO2_YM            | +                          |                      |                                                 |                                                   |
| O3_YM             | +                          |                      |                                                 |                                                   |
| Age_5_14          | -                          |                      |                                                 |                                                   |
| Age_15_19         | -                          |                      |                                                 |                                                   |
| Age_40_59         | +                          |                      |                                                 |                                                   |
| Age_60_79         | +                          |                      |                                                 |                                                   |
| Age_80            | +                          |                      |                                                 |                                                   |
| MF_Ratio          | bi                         | 1.076                | ↓                                               | ↑                                                 |
| PriInd_Ratio      | -                          |                      |                                                 |                                                   |
| SecInd_Ratio      | +                          |                      |                                                 |                                                   |
| Ind_Ratio         | +                          |                      |                                                 |                                                   |
| AquaProducts      | bi                         | 7.802                | ↑                                               | —                                                 |
| Egg               | bi                         | 9.742                | ↑                                               | —                                                 |
| GDP_PC            | -                          |                      |                                                 |                                                   |
| High_PTP          | -                          |                      |                                                 |                                                   |
| School_PTP        | -                          |                      |                                                 |                                                   |

**Table S6. Indicators related to endocrine nutrition metabolic diseases**

| <b>Indicators</b> | <b>Indicator direction</b> | <b>Turning point</b> | <b>Change trend less than the turning point</b> | <b>Change trend larger than the turning point</b> |
|-------------------|----------------------------|----------------------|-------------------------------------------------|---------------------------------------------------|
| WLST_75th         | +                          |                      |                                                 |                                                   |
| WIITV_25th        | -                          |                      |                                                 |                                                   |
| WPM10_IT3         | +                          |                      |                                                 |                                                   |
| CO_YM             | +                          |                      |                                                 |                                                   |
| WWS10m            | +                          |                      |                                                 |                                                   |
| Age_0_4           | -                          |                      |                                                 |                                                   |
| Age_15_19         | -                          |                      |                                                 |                                                   |
| Age_20_39         | bi                         | 37.894               | ↑                                               | ↓                                                 |
| Age_40_59         | +                          |                      |                                                 |                                                   |
| Age_80            | +                          |                      |                                                 |                                                   |
| TerInd_Ratio      | bi                         | 34.792               | ↑                                               | ↓                                                 |
| Ind_Ratio         | +                          |                      |                                                 |                                                   |
| Meat              | bi                         | 29.1                 | ↑                                               | ↓                                                 |
| AquaProducts      | +                          |                      |                                                 |                                                   |
| NHT_PTP           | bi                         | 8.62                 | ↑                                               | ↓                                                 |
| Uni_PTP           | bi                         | 0.285                | ↑                                               | ↓                                                 |
| High_PTP          | -                          |                      |                                                 |                                                   |
| School_PTP        | -                          |                      |                                                 |                                                   |
| ParkArea_PC       | -                          |                      |                                                 |                                                   |
| Green_Ratio       | -                          |                      |                                                 |                                                   |

**Table S7. Indicators related to digestive system diseases**

| <b>Indicators</b> | <b>Indicator direction</b> | <b>Turning point</b> | <b>Change trend less than the turning point</b> | <b>Change trend larger than the turning point</b> |
|-------------------|----------------------------|----------------------|-------------------------------------------------|---------------------------------------------------|
| WLST_50th         | bi                         | 18.657               | ↓                                               | ↑                                                 |
| WLST_99th         | bi                         | 31.77                | ↓                                               | ↑                                                 |
| WPM10_IT1         | +                          |                      |                                                 |                                                   |
| CO_YM             | +                          |                      |                                                 |                                                   |
| AQI               | +                          |                      |                                                 |                                                   |
| WRH               | bi                         | 59.6                 | ↓                                               | ↑                                                 |
| WSP               | -                          |                      |                                                 |                                                   |
| WWS10m            | bi                         | 0.871                | ↓                                               | ↑                                                 |
| Age_5_14          | bi                         | 14.307               | ↓                                               | ↑                                                 |
| Age_40_59         | bi                         | 27.322               | ↓                                               | ↑                                                 |
| Age_80            | +                          |                      |                                                 |                                                   |
| MF_Ratio          | bi                         | 1.094                | ↑                                               | ↓                                                 |
| Ind_Ratio         | bi                         | 48.745               | ↓                                               | ↑                                                 |
| Meat              | +                          |                      |                                                 |                                                   |
| Fruit             | -                          |                      |                                                 |                                                   |
| AquaProducts      | bi                         | 2.566                | ↓                                               | ↑                                                 |
| High_PTP          | bi                         | 5.684                | ↓                                               | ↑                                                 |
| Green_Ratio       | -                          |                      |                                                 |                                                   |

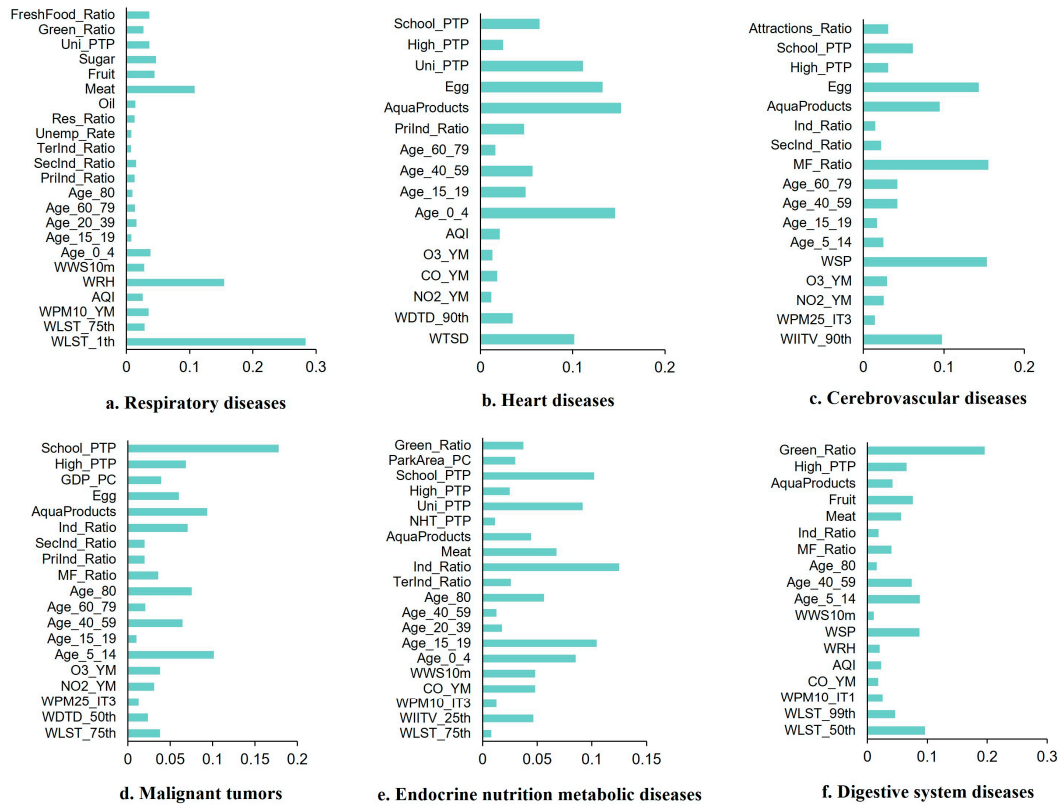

**Figure S1. Distribution of indicators and corresponding weights obtained by FAHP related to the six kinds of chronic diseases**

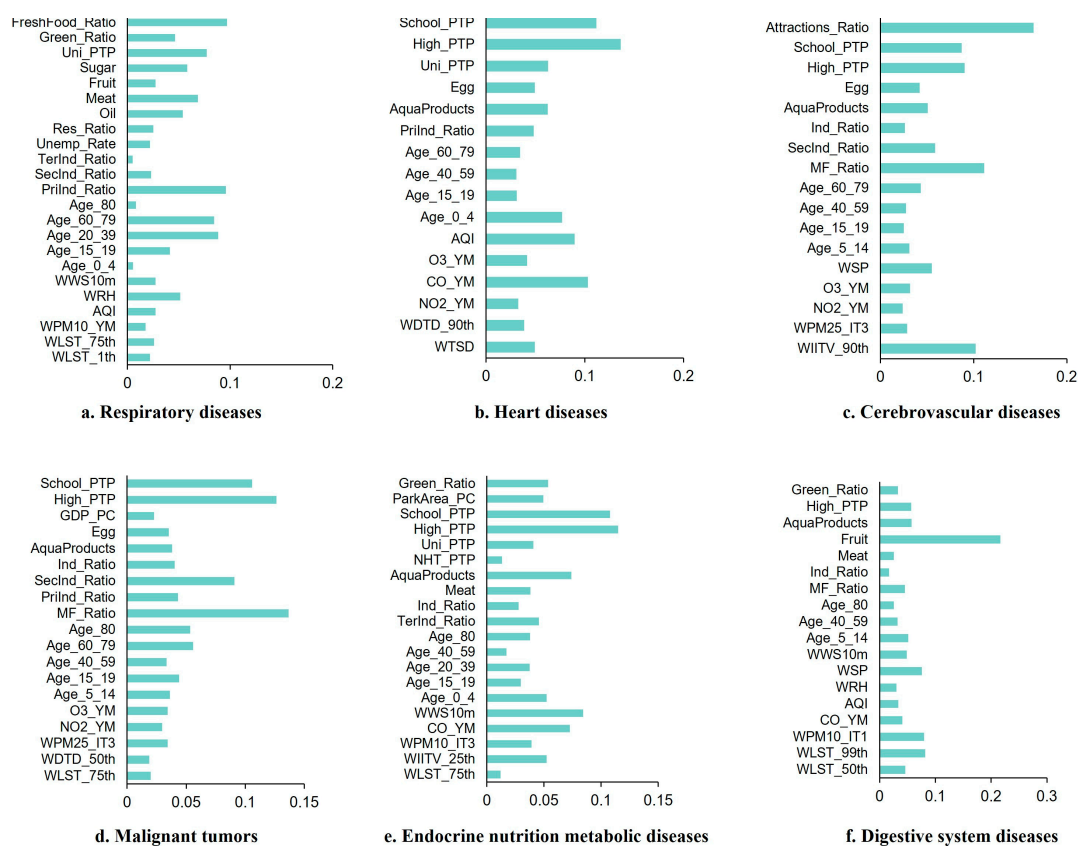

**Figure S2. Distribution of indicators and corresponding weights obtained by the entropy weight method related to the six kinds of chronic diseases**
